# Supplementary material for: Biallelic variants in SLC26A2 cause multiple epiphyseal dysplasia-4 by disturbing chondrocyte homeostasis
Source: PubMed Central journal article supplement (PMC11220988; doi:10.1186/s13023-024-03228-4), 2024-07-02

**Figure. S1**

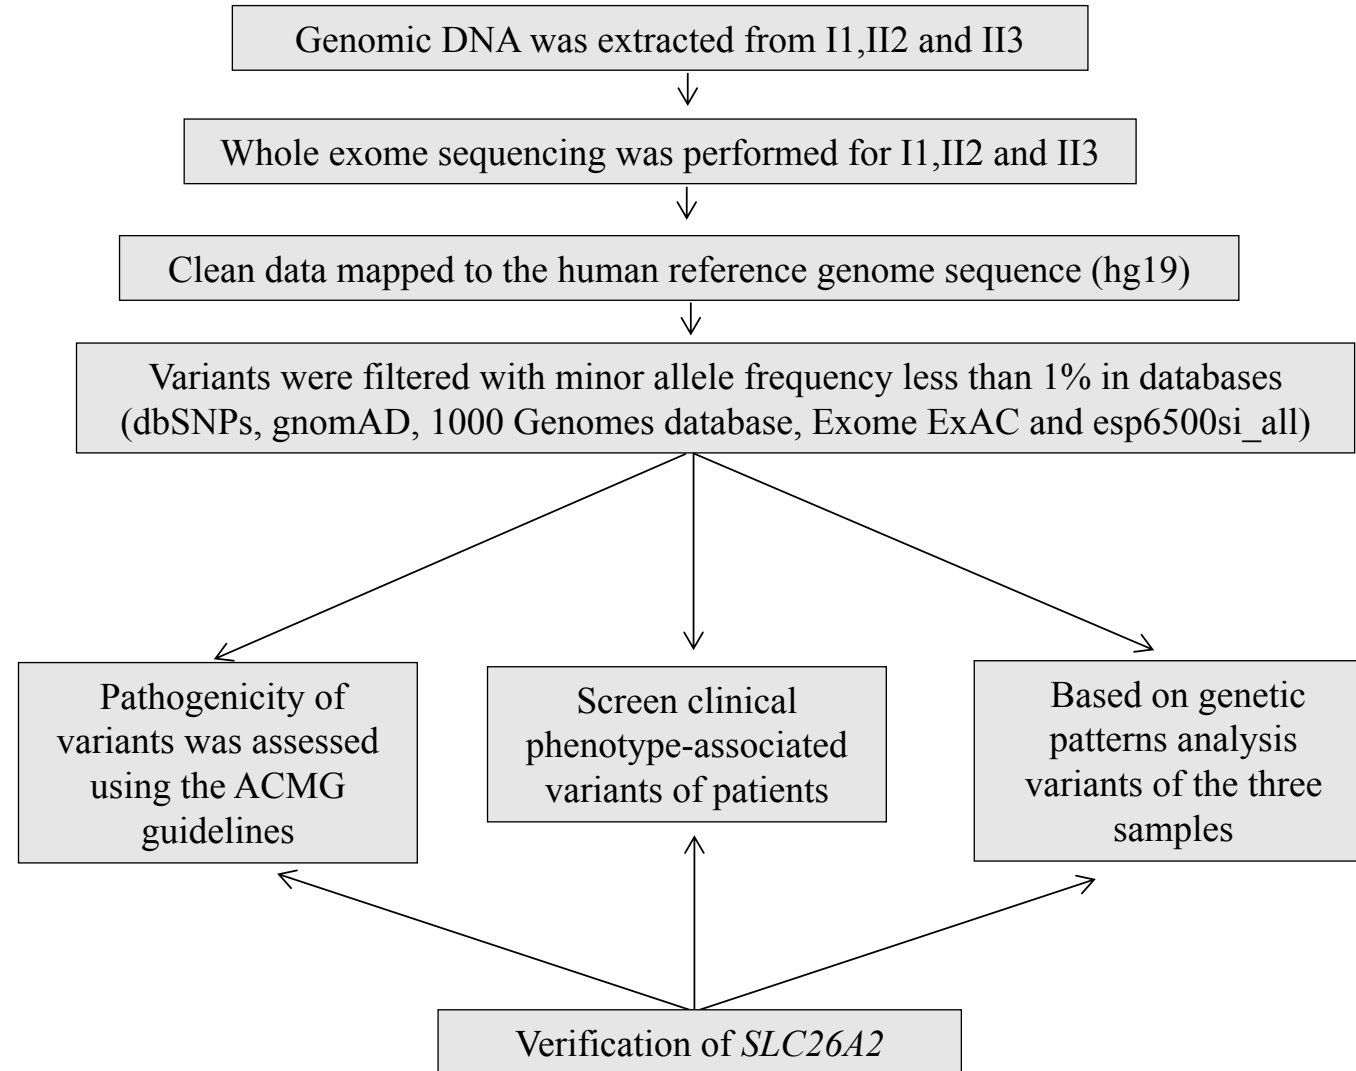

Figure. S2

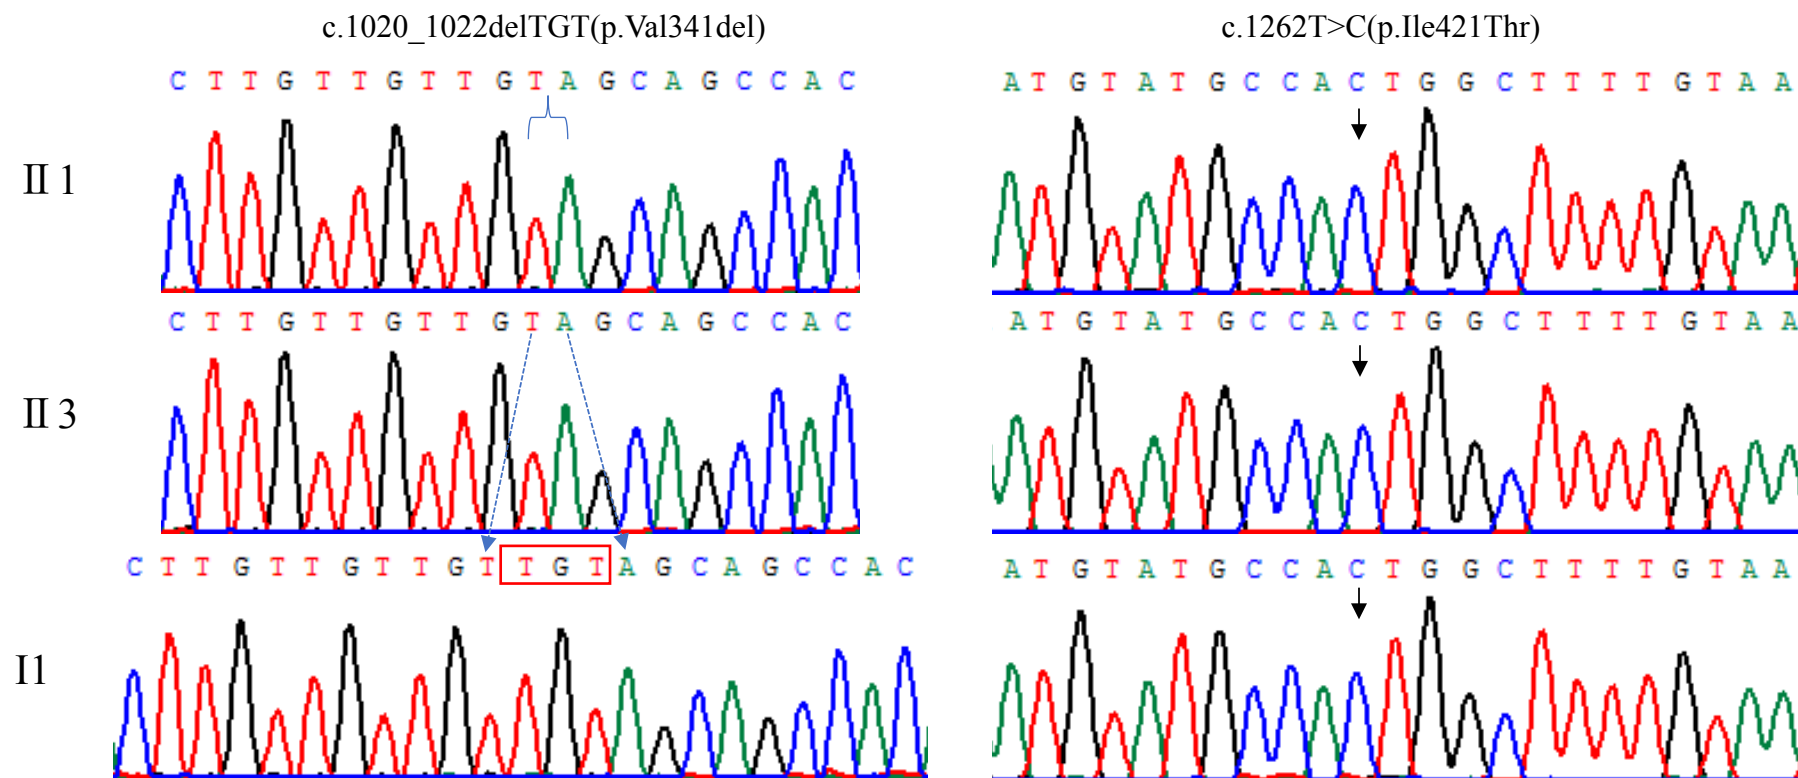

Supplement: 13023_2024_3228_MOESM1_ESM.pdf [file 13023_2024_3228_MOESM1_ESM.pdf]
